# Supplementary material for: The Interplay between the Escherichia coli Rho Guanine Nucleotide Exchange Factor Effectors and the Mammalian RhoGEF Inhibitor EspH
Source: PubMed Central journal article supplement — mBio. 2012 Jan 17;3(1):e00250-11. doi: 10.1128/mBio.00250-11 (PMC3374388; doi:10.1128/mbio.00250-11), 2012-01-17
Supplement: mbo001121214st1.pdf [file mbo001121214st1.pdf]

**Table S1.** List of Strains

| <b>ICC No.</b> | <b>Name</b>                                      | <b>Description</b>                    | <b>Source / Reference</b> |
|----------------|--------------------------------------------------|---------------------------------------|---------------------------|
|                | EPEC WT                                          | E2348/69 O127:H6 strain               | (35)                      |
| ICC246         | EPEC $\Delta$ <i>espH</i>                        | EPEC <i>espH</i> deletion mutant      | (36)                      |
| ICC202         | EPEC $\Delta$ <i>map</i>                         | EPEC <i>map</i> deletion mutant       | (9)                       |
| ICC303         | EPEC $\Delta$ <i>nleH1</i> $\Delta$ <i>nleH2</i> | EPEC <i>nleH1/nleH2</i> double mutant | (20)                      |
