# Supplementary material for: The Interplay between the Escherichia coli Rho Guanine Nucleotide Exchange Factor Effectors and the Mammalian RhoGEF Inhibitor EspH
Source: PubMed Central journal article supplement — mBio. 2012 Jan 17;3(1):e00250-11. doi: 10.1128/mBio.00250-11 (PMC3374388; doi:10.1128/mbio.00250-11), 2012-01-17
Supplement: mbo001121214st2.pdf [file mbo001121214st2.pdf]

**Table S2.** List of Plasmids

| <b>pICC No.</b> | <b>Plasmids</b>                | <b>Description</b>                                             | <b>Source/Ref</b> |
|-----------------|--------------------------------|----------------------------------------------------------------|-------------------|
|                 | pSA10                          | pKK177-3 containing <i>lacI</i> gene                           |                   |
| pICC1098        | pSA10-EspH                     | pSA10 encoding EPEC EspH                                       | This study        |
| pICC330         | pSA10-Map                      | pSA10 encoding EPEC Map                                        | (9)               |
| pICC461         | pSA10-EspT                     | pSA10 encoding E11 EspT                                        | (11)              |
| pICC427         | pSA10-EspT(W63A)               | pSA10 encoding E11 EspT with point mutation at Trp 63 to Ala   | (27)              |
| pICC398         | pSA10-EspM2                    | pSA10 encoding EHEC EspM2                                      | (10)              |
| pICC404         | pSA10-EspM2(W70A)              | pSA10 encoding EHEC EspM2 with point mutation at Trp 63 to Ala | (10)              |
|                 | pCMV-RFP                       | Mammalian expression vector encoding RFP                       | M. Seabra         |
| pICC1099        | pCMV-RFP-EspH                  | Encoding RFP-EspH fusion protein                               | This study        |
|                 | pRK5myc                        | Mammalian expression vector                                    | Invitrogen        |
| pICC563         | pRK5myc-GFP                    | Encoding Myc-tagged GFP                                        |                   |
| pICC529         | pRK5myc-EspH                   | Encoding Myc-tagged EPEC EspH                                  | This study        |
|                 | pRK5myc-p115RhoGEF             | Encoding Myc-tagged p115RhoGEF                                 | A. Hall           |
| pICC509         | pRK5myc-Map                    | Encoding Myc-tagged EPEC Map                                   | (28)              |
| pICC228         | pRK5myc-EspT                   | Encoding Myc-tagged E11 EspT                                   | (11)              |
| pICC320         | pRK5myc-EspM2                  | Encoding Myc-tagged EHEC EspM2                                 | (10)              |
| pICC1097        | pRK5myc-SopE <sub>78-240</sub> | Encoding Myc-tagged SopE (78-240 residue)                      | (6)               |
|                 | pRK5myc-Cdc42(L61)             | Encoding Myc-tagged dominant-positive Cdc42                    | E. Caron          |
|                 | pRK5myc-Rac1(L61)              | Encoding Myc-tagged dominant-positive Rac1                     | A. Hall           |
|                 | pRK5myc-RhoA(L63)              | Encoding Myc-tagged dominant-positive RhoA                     | E. Caron          |
| pICC512         | pRK5myc-NleH1                  | Encoding Myc-tagged EPEC NleH1                                 | (28)              |
