# Supplementary material for: The Interplay between the Escherichia coli Rho Guanine Nucleotide Exchange Factor Effectors and the Mammalian RhoGEF Inhibitor EspH
Source: PubMed Central journal article supplement — mBio. 2012 Jan 17;3(1):e00250-11. doi: 10.1128/mBio.00250-11 (PMC3374388; doi:10.1128/mbio.00250-11), 2012-01-17
Supplement: mbo001121214st3.pdf [file mbo001121214st3.pdf]

**Table S3.** List of Primers.

| <b>Name</b>         | <b>Nulceotide Sequence (5' – 3') [Restriction sites in bold]</b> |
|---------------------|------------------------------------------------------------------|
| EcoRI-EspH-E69-Fw   | CGGGAATTCATGTCGTCATCATTATCAGGTATAAC                              |
| BamHI-EspH-E69-Fw   | CGCGGATCCTCGTCATCATTATCAGGTATAAC                                 |
| PstI-EspH-E69-Rv    | AAA <u>ACTGCAGTTAA</u> ACTGTCACACCTGATAAAGAGTTTAATG              |
| HindIII-EspH-E69-Fw | CCCAAGCTTTCGTCATCATTATCAGGTATAAC                                 |
| EcoRI-EspH-E69-Rv   | CGGAATTCTTAAACTGTCACACCTGATAAAG                                  |
